# Supplementary material
Source: PubMed Central journal article supplement (PMC6219939)
Supplement: NIHMS1507601-supplement-2.pdf [file NIHMS1507601-supplement-2.pdf]

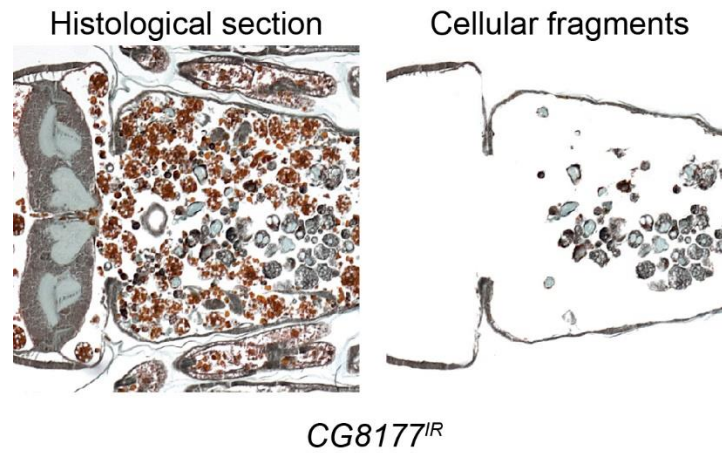

**Figure S1. Description of salivary gland degradation defect phenotype. Related to Figure 1**

A histological section (left) of an animal 24h after puparium formation with a salivary gland degradation defect (*fkh-GAL4/w; UAS-CG8177<sup>IR</sup>/+; +*). The persistent salivary gland tissue has been highlighted by removal of the surrounding tissues (right).

**A**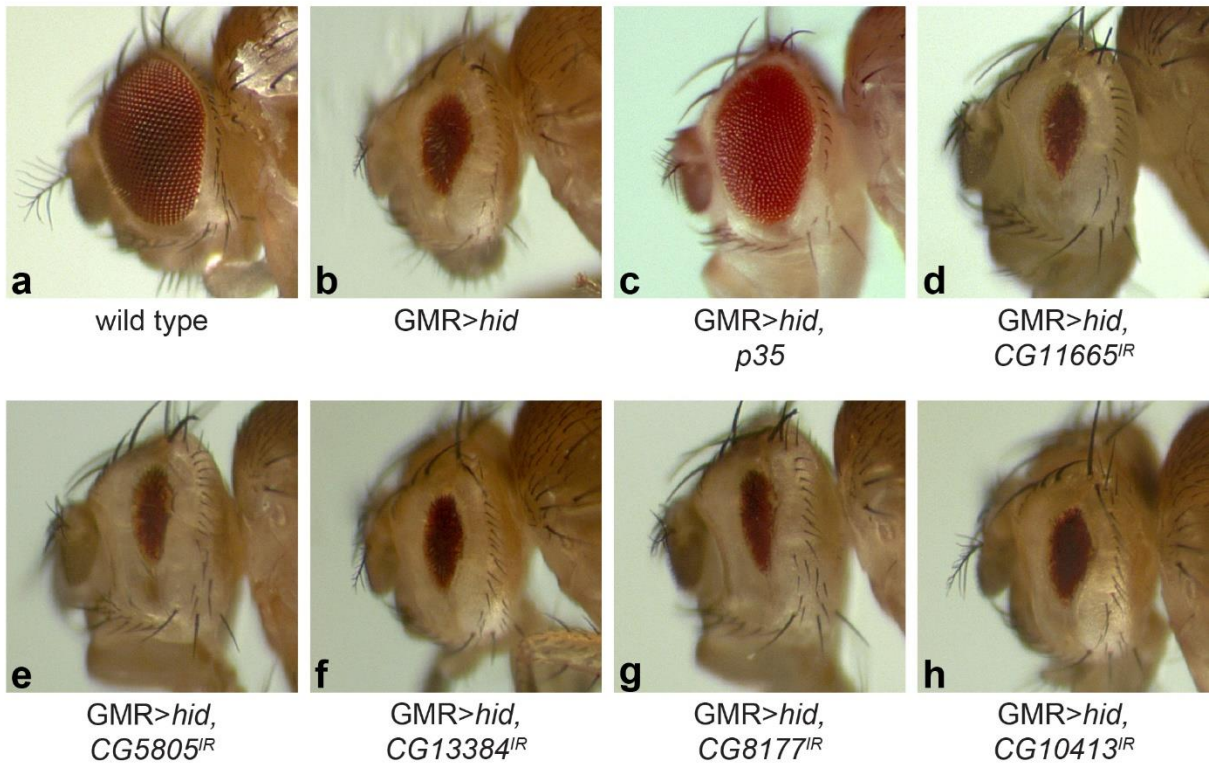**B**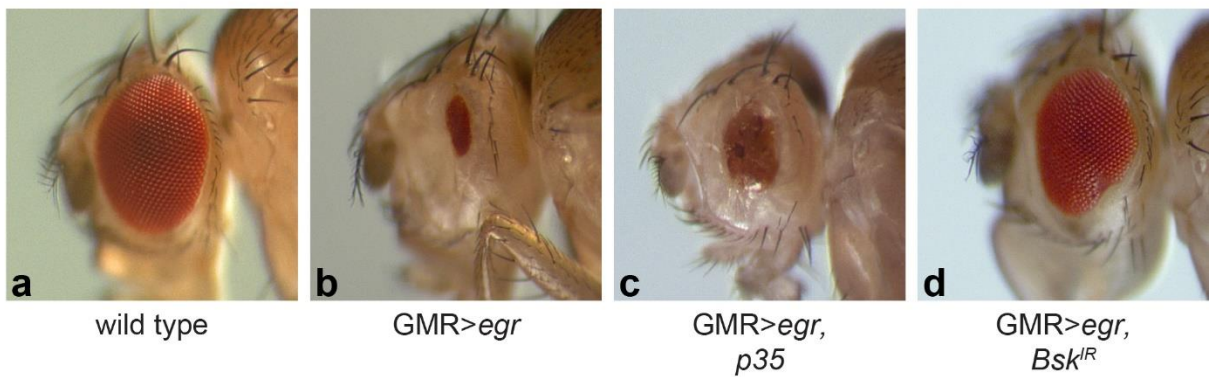

**Figure S2. The identified *SLC* genes do not suppress *hid*-induced apoptotic cell death.**

**Related to Figure 2**

(Aa) Eye from a wild type animal. (Ab) Eye from a control animal that expresses *hid* specifically in the eye disc (*GMR-hid*). (Ac) Eye from an animal that expresses *hid* and *p35*. (Ad) Eye from

an animal that expresses hid and *CG11665<sup>IR</sup>*. (Ae) Eye from an animal that expresses hid and *CG5805<sup>IR</sup>*. (Af) Eye from an animal that expresses hid and *CG13384<sup>IR</sup>*. (Ag) Eye from an animal that expresses hid and *CG8177<sup>IR</sup>*. (Ah) Eye from an animal that expresses hid and *CG10413<sup>IR</sup>*. (Ba) Eye from a wild type animal. (Bb) Eye from a control animal that expresses Eiger specifically in the eye disc (*GMR-egr*). (Bc) Eye from an animal that expresses Eiger and *p35*. (Bd) Eye from an animal that expresses Eiger and *Bsk<sup>IR</sup>*. All animals were 3-5 days old.

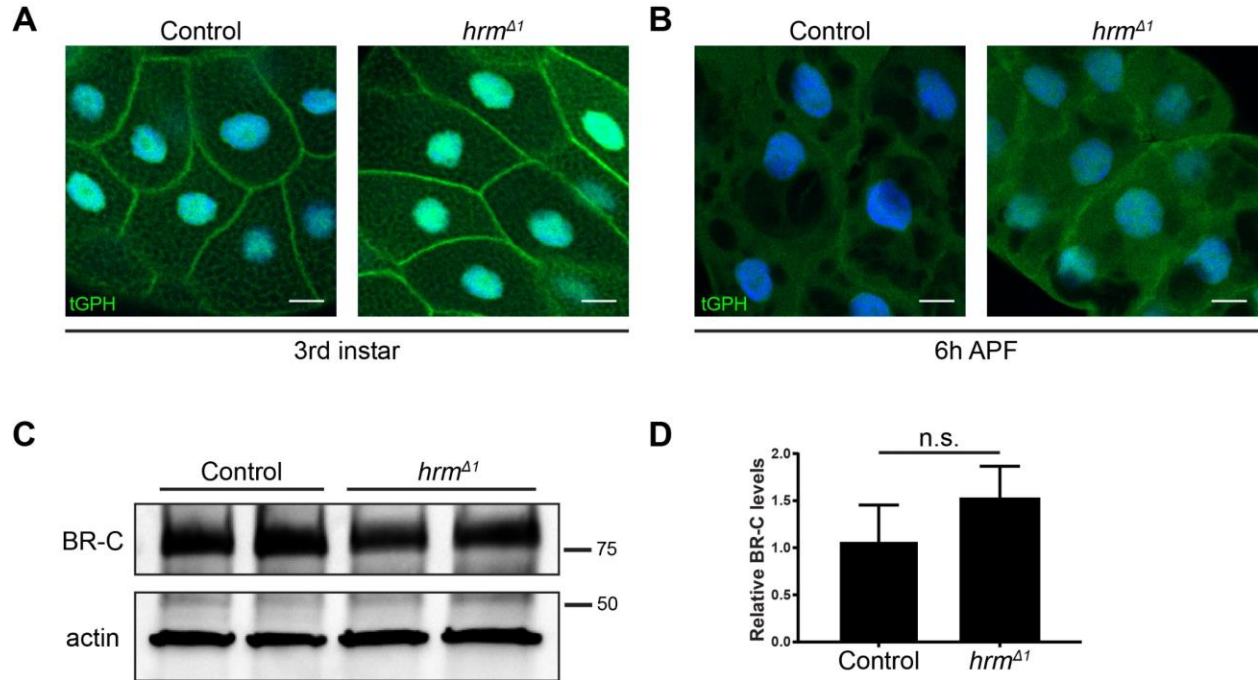

**Figure S3. Loss of *hermes* neither influences cell growth nor hormone signaling. Related to Figure 3**

(A) Salivary gland tGPH analyses in feeding 3rd instar larvae from control (left) and *herm*<sup>Δ1</sup> animals (right). Scale bars represent 20μm. (B) Salivary gland tGPH analyses in 13.5h after puparium formation pupae from control (left) and *herm*<sup>Δ1</sup> animals (right). Scale bars represent 20μm. (C) Western blot analyses of BR-C and actin 13.5 h after puparium formation in salivary gland extracts from control (*w*; *herm*<sup>Δ1</sup>/+; +), n=4, and *herm* mutant animals (*w*; *herm*<sup>Δ1</sup>/*Df*(2*R*)*BSC696*; +), n=4. (D) Quantification of data from (C). All samples are normalized to actin and plotted relative to control sample. Data are represented as mean ± SEM. Statistical significance was determined using a Student's t test.

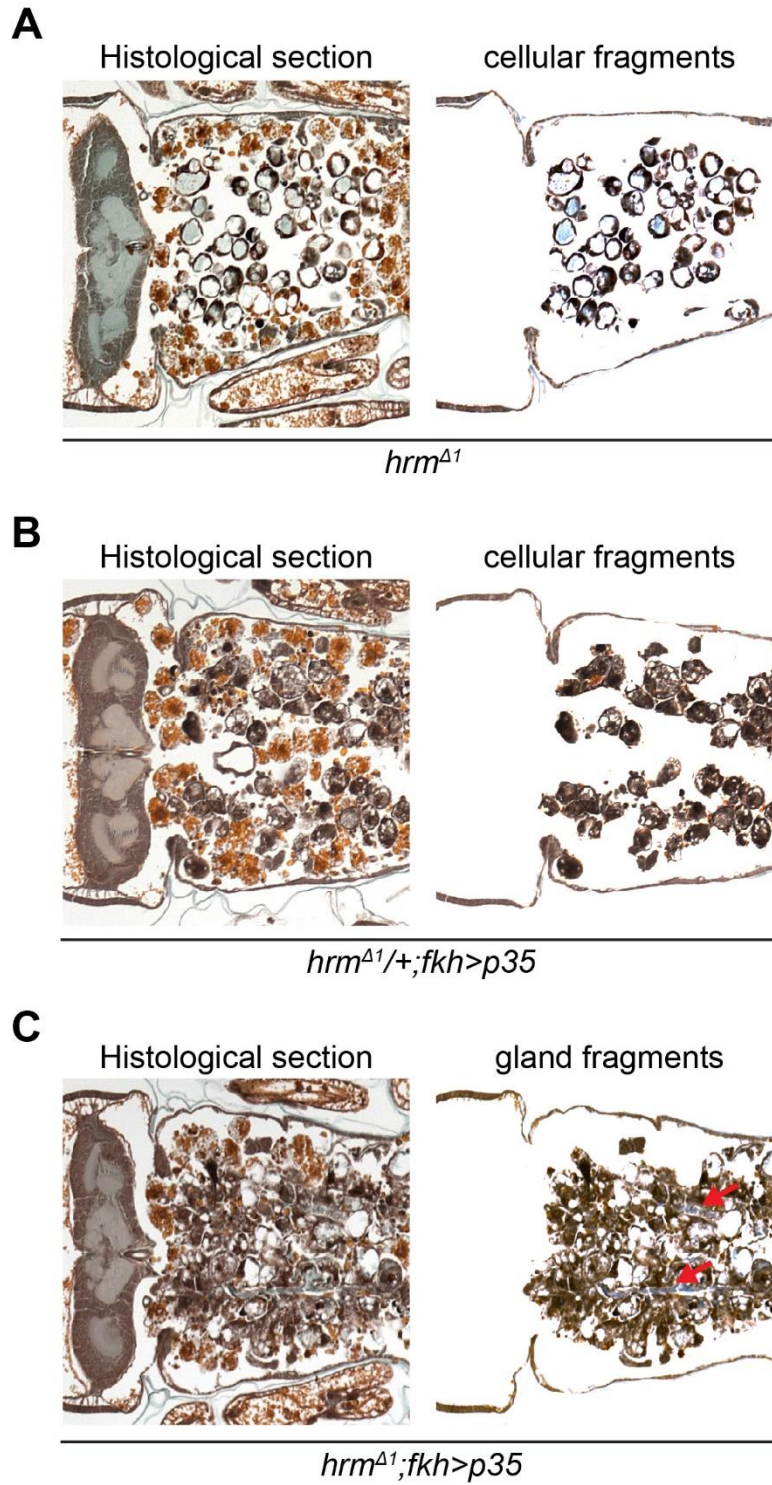

**Figure S4. Description of different salivary gland degradation phenotypes. Related to Figure 4**

(A) and (B) Histological sections (left) 24h after puparium formation of animals with partially degraded salivary glands resulting in a cellular fragment phenotype [(A) *w; hrm<sup>Δ1</sup>/Df(2R)BSC696; fkh-GAL4/+*, (B) *w; hrm<sup>Δ1</sup>/+; fkh-GAL4/UAS-p35*]. The surrounding tissues have been removed to emphasize the remaining salivary gland tissue (right). Note the diffuse nature of the salivary gland material. (C) Histological section (left) 24h after puparium formation of an animal with partially degraded salivary glands resulting in a gland fragment phenotype (*w; hrm<sup>Δ1</sup>/Df(2R)BSC696; fkh-GAL4/UAS-p35*). The surrounding tissues have been removed to emphasize the remaining salivary gland tissue (right). Note that the remaining salivary gland tissue retains its basic glandular structure (arrows) and is less diffuse than in (A) or (B).

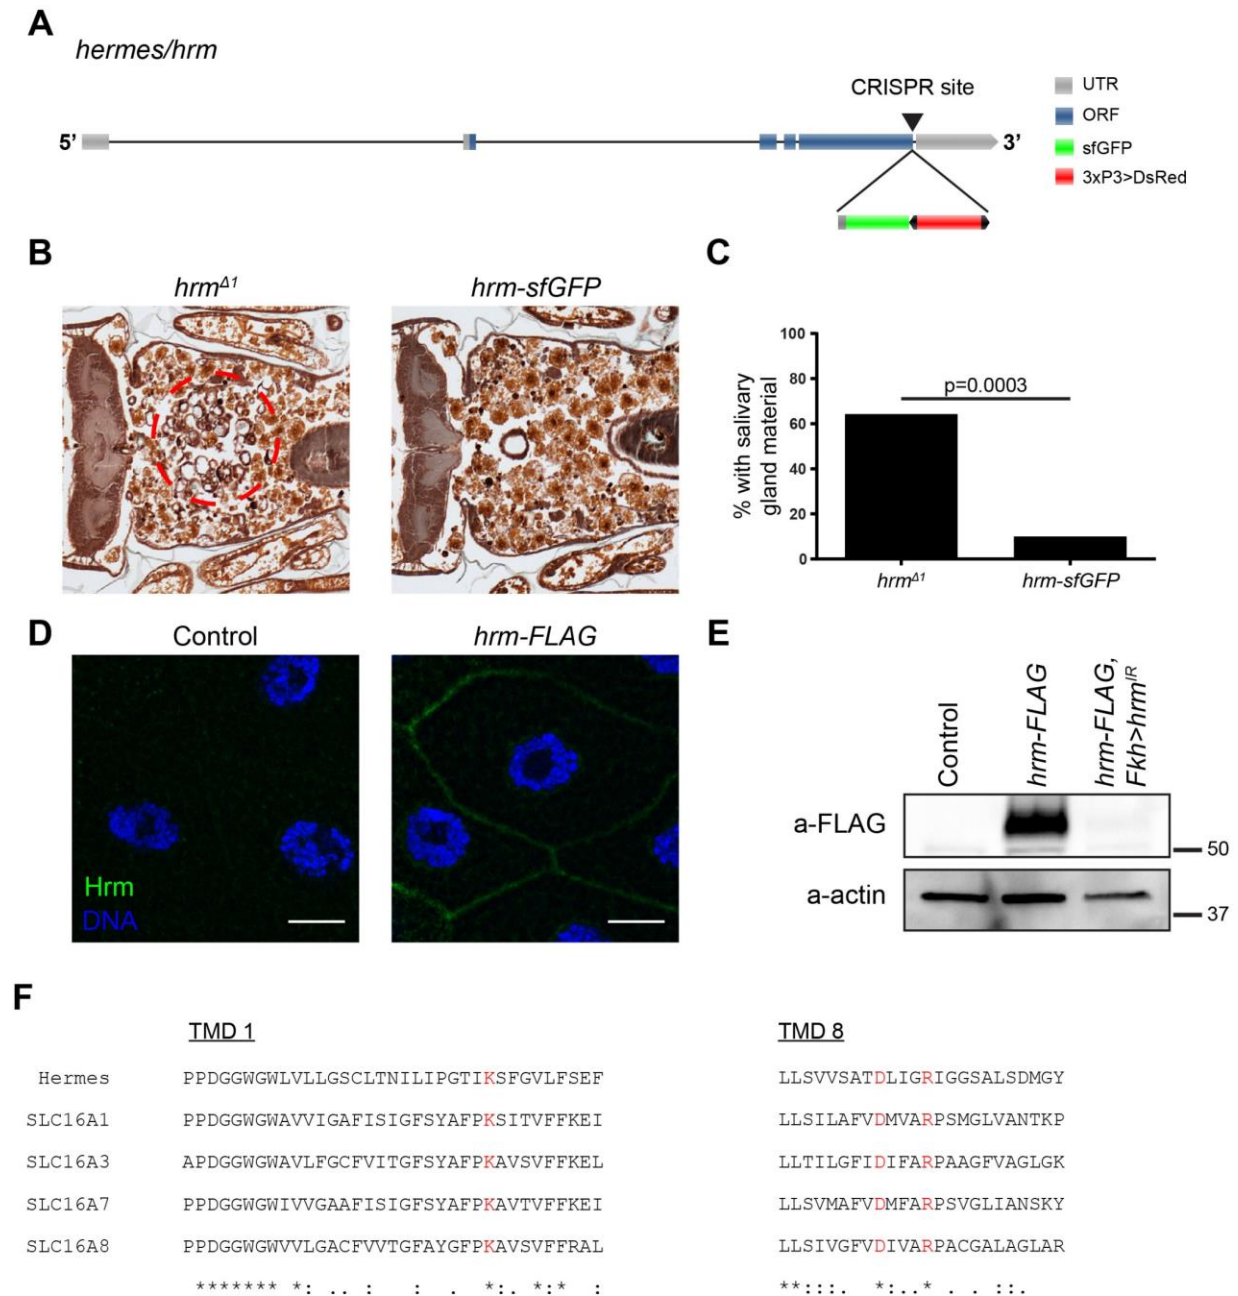

**Figure S5. *hermes* encodes a plasma membrane monocarboxylate transporter. Related to Figure 6**

(A) Schematic representation of *hermes*. The arrow indicate the CRISPR targeted site where the sfGFP sequence was inserted. (B) Samples from control *hrm* mutants animals (w;

*hrm*<sup>Δ1</sup>/*Df(2R)BSC696*; +), n=20 (left) and *hrm-sfGFP* animals (*w*; *hrm-sfGFP/Df(2R)BSC696*; +), n=20 (right), analyzed by histology for the presence of salivary gland material (red dotted circle) 24h after puparium formation.. (C) Quantification of data from (B). Statistical significance was determined using a Chi-square test. (D) Salivary glands dissected from control 3<sup>rd</sup> instar larvae (*w*; +; +) (left), *hrm-FLAG* larvae (*w*; *hrm-FLAG*; +), (right) stained with FLAG antibody (green) and Hoechst (blue). Scale bars represent 20μm. (E) Western blot analyses of FLAG and actin in salivary gland extracts from control (*w*; +; +), *hrm-FLAG* (*w*; *hrm-FLAG*; +) and *hrm-FLAG* with salivary gland specific *hrm* downregulation (*w*; *hrm-FLAG*; *Fkh-GAL4/hrm*<sup>*IR*</sup>) 3<sup>rd</sup> instar larvae. (F) Sequence alignment of transmembrane domains (TMDs) 1 and 8 from *hrm* and SLC16 category I family members. Residues conserved in SLC16 category I members are indicated in red.

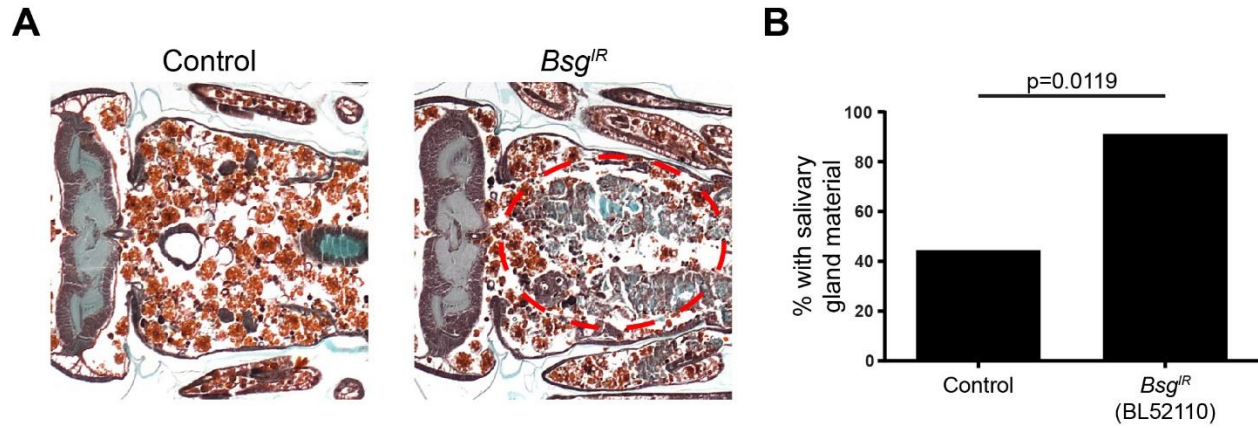

**Figure S6. Down-regulation of *Bsg* results in persistence of salivary gland material.**

**Related to Figure 6**

(A) Samples from control animals (*w/+; UAS-Bsg<sup>IR</sup>/+; +*), *n* = 13 (left), and those with salivary gland-specific knockdown of *Bsg* (*fkh-GAL4/w; UAS-Bsg<sup>IR</sup>/+; +*), *n* = 11 (right), analyzed with histology for the presence of salivary gland material (red dotted circle) 24h after puparium formation. (B) Quantification of data from (A). Statistical significance was determined using a Chi-square test.

| <b>FlyBase Number</b> | <b>Common Name</b> | <b>Human ortholog (DIOPT v6)</b> | <b>RNAi line</b> | <b>% with fragments</b> | <b>p</b> |
|-----------------------|--------------------|----------------------------------|------------------|-------------------------|----------|
| FBgn0033028           | CG11665            | SLC16A11                         | v7314            | 100.00%                 | 0.0001   |
|                       |                    |                                  | BL52902          | 85.00%                  | 0.0001   |
| FBgn0039223           | CG5805             | SLC25A44                         | v35592           | 95.83%                  | 0.0001   |
|                       |                    |                                  | BL57571          | 62.50%                  | 0.0004   |
| FBgn0032036           | CG13384            | SLC36A4                          | BL41703          | 95.00%                  | 0.0001   |
|                       |                    |                                  | v106698          | 75.00%                  | 0.4011   |
| FBgn0036043           | CG8177             | SLC4A2                           | v109594          | 91.30%                  | 0.0001   |
|                       |                    |                                  | BL51827          | 16.67%                  |          |
| FBgn0031676           | senju              | SLC35A5                          | v13399           | 95.83%                  | 0.0001   |
|                       |                    |                                  | v110668          | 66.67%                  | 0.0001   |
| FBgn0034611           | MFS16              | SLC37A2                          | v6591            | 87.50%                  | 0.0001   |
|                       |                    |                                  | v108635          | 54.17%                  | 0.0005   |
| FBgn0036732           | Oatp74D            | SLCO1A2                          | v37295           | 95.83%                  | 0.0001   |
| FBgn0032123           | Oatp30B            | SLCO5A1                          | v110237          | 62.50%                  | 0.0001   |
|                       |                    |                                  | v22983           | 50.00%                  | 0.0001   |
| FBgn0032689           | CG10413            | SLC12A9                          | v103780          | 66.67%                  | 0.002    |
|                       |                    |                                  | BL58307          | 25.00%                  |          |
| FBgn0037203           | slif               | SLC7A1                           | v110425          | 54.17%                  | 0.0001   |
|                       |                    |                                  | v45590           | 8.33%                   |          |
| FBgn0039714           | Zip99C             | SLC39A13                         | BL50635          | 62.50%                  | 0.0316   |
|                       |                    |                                  | v1362            | 25.00%                  |          |
| FBgn0036770           | Prestin            | SLC26A5                          | BL50706          | 62.50%                  | 0.002    |
|                       |                    |                                  | v5341            | 8.33%                   |          |
| FBgn0036816           | Indy               | SLC13A2                          | v9981            | 25.00%                  |          |
|                       |                    |                                  | v9982            | 50.00%                  | 0.0899   |
| FBgn0035173           | CG13907            | SCL16A14                         | v107339          | 45.83%                  |          |
| FBgn0011603           | ine                | SLC6A13                          | BL51919          | 41.67%                  |          |
|                       |                    |                                  | v8880            | 33.33%                  |          |
| FBgn0029896           | CG3168             | SLC22A20                         | BL29301          | 41.67%                  |          |
|                       |                    |                                  | v48010           | 0.00%                   |          |
| FBgn0036116           | CG7888             | SLC36A3                          | v37263           | 33.33%                  |          |
|                       |                    |                                  | v37264           | 33.33%                  |          |
| FBgn0034494           | CG10444            | SLC5A6                           | v4722            | 16.67%                  |          |

|             |        |          |         |        |  |
|-------------|--------|----------|---------|--------|--|
|             |        |          | v107008 | 33.33% |  |
| FBgn0037140 | CG7442 | SLC22A5  | BL35817 | 8.33%  |  |
|             |        |          | v106555 | 33.33% |  |
| FBgn0033234 | CG8791 | SLC17A4  | BL34728 | 33.33% |  |
|             |        |          | v7945   | 0.00%  |  |
| FBgn0028563 | sut1   | SLC2A5   | v104983 | 16.67% |  |
|             |        |          | v9950   | 16.67% |  |
| FBgn0035432 | ZnT63C | SLC30A1  | v105145 | 16.67% |  |
| FBgn0031250 | Ent1   | SLC29A1  | BL51055 | 8.33%  |  |
|             |        |          | v109885 | 8.33%  |  |
| FBgn0019952 | Orct   | SLC22A4  | BL60125 | 0.00%  |  |
|             |        |          | v6782   | 0.00%  |  |
| FBgn0031038 | Tyler  | SLC25A40 | N/A     |        |  |

**TableS1. SLC genes that are upregulated before salivary gland degradation. Related to Figure 1**
